# Supplementary material
Source: PubMed Central journal article supplement (PMC4601555)
Supplement: Supp_Data.pdf [file Supp_Data.pdf]

SUPPLEMENTAL TABLE S1. DEMOGRAPHIC DATA FOR EACH SUBJECT WITH MTBI AND SUMMARY OF RADIOLOGICAL FINDINGS

| Subject ID | Site  | Age | Gen der | Handed ness | Educati on (years) | Occupation                            | Premorbid psychiatry history                                | Cause of TBI      | LOC (y/n) | LOC duration              | PTA (y/n) |
|------------|-------|-----|---------|-------------|--------------------|---------------------------------------|-------------------------------------------------------------|-------------------|-----------|---------------------------|-----------|
| p10        | WashU | 57  | M       | R           | 20                 | Surgeon                               | None                                                        | Fall or contusion | Yes       | seconds                   | Yes       |
| p11        | WashU | 43  | M       | R           | 17                 | Manager of technology consultant      | None                                                        | Fall or contusion | Yes       | N/A                       | Yes       |
| p14        | WashU | 38  | F       | R           | 19                 | Attorney                              | None                                                        | MVA               | Yes       | N/A                       | Yes       |
| p15        | WashU | 41  | F       | R           | 18                 | Non-profit administration             | Post-partum depression, remotely (12 years prior to injury) | Fall or contusion | Yes       | seconds                   | Yes       |
| p16        | WashU | 41  | F       | R           | 16                 | Vice president of a college           | None                                                        | MVA               | Yes       | 20 min                    | Yes       |
| p17        | WashU | 27  | F       | R           | 18                 | Director of athletics at a university | None                                                        | Fall or contusion | Yes       | Approx. 30 min            | Yes       |
| p19        | WashU | 48  | M       | R           | 13                 | Manager car dealership                | None                                                        | MVA               | Yes       | 2 min                     | Yes       |
| p20        | WashU | 46  | F       | R           | 16                 | Software developer                    | None                                                        | Fall or contusion | N/A       | N/A                       | Yes       |
| p22        | WashU | 55  | M       | R           | 14                 | Store owner                           | None                                                        | MVA               | Yes       | 1-2h                      | Yes       |
| p23        | WashU | 47  | M       | R           | 14                 | Insurance agent                       | None                                                        | Fall or contusion | Yes       | 1.5h                      | Yes       |
| p24        | WashU | 40  | F       | R           | 14                 | Realtor                               | Prozac for PMS-related mood changes                         | Fall or contusion | Yes       | 3-5 min                   | Yes       |
| p27        | WashU | 54  | M       | R           | 12                 | Factory worker                        | Depression; remote history of alcoholism                    | MVA               | Yes       | 5 min                     | Yes       |
| p28        | WashU | 20  | F       | R           | 12                 | Data entry                            | Anger management problem                                    | Fall or contusion | Yes       | min                       | Yes       |
| p29        | WashU | 53  | F       | R           | 13                 | Trucker                               | None                                                        | Fall or contusion | N/A       | N/A                       | Yes       |
| p31        | WashU | 22  | M       | R           | 15                 | College student                       | None                                                        | Sports injury     | Yes       | 3 min                     | Yes       |
| p32        | WashU | 27  | M       | A           | 13                 | Courier                               | None                                                        | MVA               | Yes       | 1-5 min                   | Yes       |
| p33        | WashU | 43  | F       | R           | 13                 | Customer service representative       | Remote history of adjustment disorder                       | MVA               | Yes       | Yes (woke up in hospital) | Yes       |
| p34        | WashU | 31  | F       | R           | 16                 | Training specialist                   | None                                                        | Fall or contusion | Yes       | 30 seconds                | Yes       |
| p36        | WashU | 21  | F       | R           | 16                 | College student                       | None                                                        | Fall or contusion | No        | NO                        | Yes       |
| p37        | WashU | 42  | M       | R           | 20                 | Physician                             | None                                                        | Fall or contusion | N/A       | N/A                       | Yes       |
| T001       | UCSD  | 37  | F       | R           | 18                 | N/A                                   | N/A                                                         | Sports injury     | N/A       | N/A                       | Yes       |
| T002       | UCSD  | 27  | M       | R           | 14                 | N/A                                   | N/A                                                         | Fall or contusion | Yes       | 10 - 15 sec               | Yes       |
| T003       | UCSD  | 31  | M       | R           | 14                 | N/A                                   | N/A                                                         | Sports injury     | Yes       | <15 sec                   | Yes       |
| T006       | UCSD  | 34  | M       | R           | 12                 | N/A                                   | N/A                                                         | Sports injury     | Yes       | 5 min                     | Yes       |
| T007       | UCSD  | 24  | M       | R           | 14                 | N/A                                   | N/A                                                         | Fall or contusion | Yes       | <15 sec                   | Yes       |
| T008       | UCSD  | 57  | M       | R           | 16                 | N/A                                   | N/A                                                         | MVA               | Yes       | <24h                      | Yes       |

(continued)

SUPPLEMENTARY TABLE S1. (CONTINUED)

| Subject ID | Site | Age | Gender | Handedness | Educational (years) | Occupation | Premorbid psychiatric history | Cause of TBI      | LOC (y/n) | LOC duration | PTA (y/n) |
|------------|------|-----|--------|------------|---------------------|------------|-------------------------------|-------------------|-----------|--------------|-----------|
| T009       | UCSD | 53  | M      | R          | 14                  | N/A        | N/A                           | Fall or contusion | Yes       | 5 – 10 min   | Yes       |
| T010       | UCSD | 25  | M      | R          | 14                  | N/A        | N/A                           | MVA               | No        | 0            | Yes       |
| T011       | UCSD | 42  | M      | R          | 16                  | N/A        | N/A                           | Fall or contusion | Yes       | <15 sec      | Yes       |
| T012       | UCSD | 42  | F      | R          | 14                  | N/A        | N/A                           | MVA               | Yes       | 5 min        | Yes       |
| T013       | UCSD | 26  | M      | R          | 16                  | N/A        | N/A                           | Sports injury     | No        | 0            | Yes       |
| T014       | UCSD | 21  | M      | R          | 15                  | N/A        | N/A                           | Sports injury     | Yes       | 1 – 3 h      | Yes       |
| T016       | UCSD | 39  | M      | R          | 14                  | N/A        | N/A                           | Fall or contusion | No        | 0            | Yes       |
| T017       | UCSD | 22  | M      | R          | 16                  | N/A        | N/A                           | Sports injury     | Yes       | 30 min       | Yes       |
| T018       | UCSD | 28  | M      | L          | 16                  | N/A        | N/A                           | Fall or contusion | Yes       | 1 – 2 min    | Yes       |
| T019       | UCSD | 30  | M      | R          | 16                  | N/A        | N/A                           | Sports injury     | No        | 0            | N/A       |
| T020       | UCSD | 21  | F      | R          | 14                  | N/A        | N/A                           | Sports injury     | No        | 0            | Yes       |
| T021       | UCSD | 21  | M      | R          | 15                  | N/A        | N/A                           | Sports injury     | No        | 0            | Yes       |
| T022       | UCSD | 29  | M      | R          | 16                  | N/A        | N/A                           | Sports injury     | No        | 0            | Yes       |
| T023       | UCSD | 55  | M      | R          | 14                  | N/A        | N/A                           | Fall or contusion | Yes       | <15 sec      | No        |
| T024       | UCSD | 19  | M      | R          | 12                  | N/A        | N/A                           | Sports injury     | Yes       | 5 min        | N/A       |
| T025       | UCSD | 28  | M      | R          | 16                  | N/A        | N/A                           | Fall or contusion | N/A       | N/A          | N/A       |
| T026       | UCSD | 41  | M      | R          | 13                  | N/A        | N/A                           | Fall or contusion | Yes       | <24 h        | Yes       |
| T027       | UCSD | 43  | M      | R          | 14                  | N/A        | N/A                           | MVA               | Yes       | <24 h        | Yes       |
| T028       | UCSD | 22  | F      | R          | 14                  | N/A        | N/A                           | Fall or contusion | Yes       | <5 min       | Yes       |

MPI, months post injury; GCS, Glasgow Coma Scale; MVA, Motor Vehicle Accident; N/A, Not Available; PTA, Post-traumatic amnesia, LOC, loss of consciousness, L, left handed, R, right handed, A, ambidextrous, M, male, F, female. HISQ, number of symptoms on HISQ 1–20 scale that appeared or became worse after mTBI.

| <i>Subject ID</i> | <i>Anterograde PTA duration</i> | <i>GCS</i> | <i>MPI</i> | <i>HISQ</i> | <i>Return to work (y/n)</i> | <i>CT/MRI brain</i>                                                                  | <i>BOLD magnitudes (y/n)</i> |
|-------------------|---------------------------------|------------|------------|-------------|-----------------------------|--------------------------------------------------------------------------------------|------------------------------|
| p10               | 30 min                          | 15         | 3.6        | 1.0         | Yes                         | Small L. fronto-temporal subarachnoid hemorrhage                                     | Yes                          |
| p11               | 72 h                            | 15         | 17.9       | 15.0        | Yes                         | L. temporal contusion                                                                | No                           |
| p14               | 30 min                          | 15         | 7.2        | 16.0        | No                          | Single small T2/Flair white matter signal hyperintensity L frontal lobe (idiopathic) | Yes                          |
| p15               | 1 h                             | 15         | 3.6        | 10.0        | Yes                         | Normal CT                                                                            | Yes                          |
| p16               | 3–4 h                           | 15         | 19.5       | 8.0         | Yes                         | Normal CT                                                                            | Yes                          |
| p17               | 36 h                            | 14         | 3.2        | 6.0         | Yes                         | Small bilateral epidural hematomas, small multiple punctate contusions               | Yes                          |
| p19               | 5 min                           | 15         | 29.6       | 6.0         | Yes                         | Normal MRI                                                                           | Yes                          |
| p20               | 5 min                           | 15         | 63.7       | 13.0        | Yes                         | Normal MRI                                                                           | Yes                          |
| p22               | 1 h                             | 14         | 11.8       | 18.0        | No                          | N/A                                                                                  | Yes                          |
| p23               | 48 h                            | 15         | 12.1       | 12.0        | Yes                         | Normal CT                                                                            | No                           |
| p24               | 1–2 h                           | 15         | 16.9       | 1.0         | Yes                         | Normal CT                                                                            | Yes                          |
| p27               | 1–2 h                           | N/A        | 15.2       | 4.0         | Yes                         | Normal CT                                                                            | Yes                          |
| p28               | 1 h                             | N/A        | 14.6       | 4.0         | No                          | Normal CT                                                                            | Yes                          |
| p29               | 2–5 min                         | N/A        | 3.2        | 13.0        | No                          | Normal CT                                                                            | Yes                          |
| p31               | 10 min                          | N/A        | 13.6       | 12.0        | Yes                         | Normal MRI                                                                           | No                           |
| p32               | 3–5 min                         | N/A        | 3.7        | 11.0        | Yes                         | Normal CT                                                                            | Yes                          |
| p33               | 1–2 h                           | N/A        | 5.0        | 7.0         | Yes                         | Normal CT                                                                            | Yes                          |
| p34               | 5 min                           | 15         | 3.7        | 9.0         | Yes                         | Normal CT                                                                            | Yes                          |
| p36               | 15 min                          | N/A        | 27.4       | 7.0         | Yes                         | Normal MRI                                                                           | Yes                          |
| p37               | 9–10 h                          | N/A        | 9.0        | 3.0         | Yes                         | Normal CT                                                                            | Yes                          |
| T001              | 1–24 h                          | N/A        | 65.0       | 13          | N/A                         | N/A                                                                                  | No                           |
| T002              | <5 min                          | N/A        | 37.0       | 5           | N/A                         | N/A                                                                                  | No                           |
| T003              | <5 min                          | N/A        | 25.0       | 10          | N/A                         | N/A                                                                                  | No                           |
| T006              | <5 min                          | N/A        | 54.0       | 5           | N/A                         | N/A                                                                                  | No                           |
| T007              | <5 min                          | N/A        | 13.0       | 8           | N/A                         | N/A                                                                                  | No                           |
| T008              | <5 min                          | N/A        | 30.0       | 9           | N/A                         | N/A                                                                                  | No                           |
| T009              | <5 min                          | N/A        | 55.0       | 6           | N/A                         | N/A                                                                                  | No                           |
| T010              | <5 min                          | N/A        | 48.0       | 5           | N/A                         | N/A                                                                                  | No                           |
| T011              | <5 min                          | N/A        | 15.0       | 14          | N/A                         | N/A                                                                                  | No                           |
| T012              | <5 min                          | N/A        | 35.0       | 10          | N/A                         | N/A                                                                                  | No                           |
| T013              | <5 min                          | N/A        | 49.0       | 3           | N/A                         | N/A                                                                                  | No                           |
| T014              | 1–24 h                          | N/A        | 47.0       | 3           | N/A                         | N/A                                                                                  | No                           |
| T016              | <5 min                          | N/A        | 39.0       | 2           | N/A                         | N/A                                                                                  | No                           |
| T017              | 5 – 30 min                      | N/A        | 54.0       | 5           | N/A                         | N/A                                                                                  | No                           |
| T018              | <5 min                          | N/A        | 24.0       | 4           | N/A                         | N/A                                                                                  | No                           |
| T019              | N/A                             | N/A        | 9.0        | 3           | N/A                         | N/A                                                                                  | No                           |
| T020              | <5 min                          | N/A        | 7.0        | 6           | N/A                         | N/A                                                                                  | No                           |
| T021              | <5 min                          | N/A        | 36.0       | 1           | N/A                         | N/A                                                                                  | No                           |
| T022              | <5 min                          | N/A        | 30.0       | 4           | N/A                         | N/A                                                                                  | No                           |
| T023              | 0                               | N/A        | 6.0        | 3           | N/A                         | N/A                                                                                  | No                           |
| T024              | N/A                             | N/A        | 28.0       | 5           | N/A                         | N/A                                                                                  | No                           |
| T025              | N/A                             | N/A        | 36.0       | 9           | N/A                         | N/A                                                                                  | No                           |
| T026              | 1–24 h                          | N/A        | 47.0       | 15          | N/A                         | N/A                                                                                  | No                           |
| T027              | <5 min                          | N/A        | 3.0        | 15          | N/A                         | N/A                                                                                  | No                           |
| T028              | <5 min                          | N/A        | 3.0        | 5           | N/A                         | N/A                                                                                  | No                           |
