# Supplementary material
Source: PubMed Central journal article supplement (PMC4601555)
Supplement: Supp_Fig1.pdf [file Supp_Fig1.pdf]

## Supplementary Data

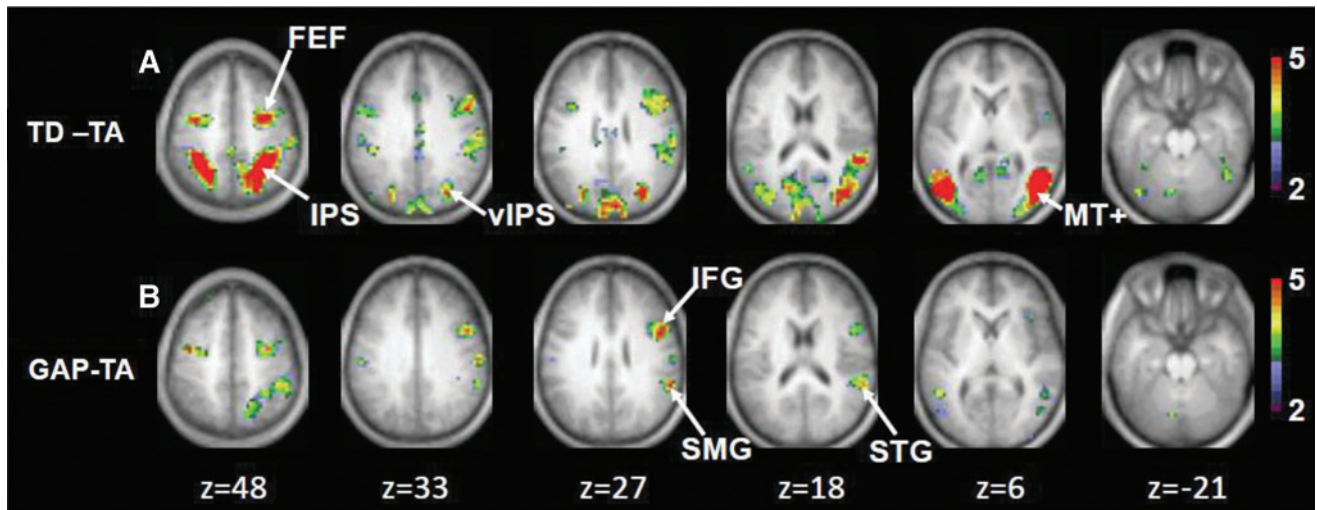

**SUPPLEMENTARY FIG. 1.** Voxelwise statistical maps showing that significant differences between tasks were observed in regions involved in attention and eye movements. Selected brain slices representing  $z$  values from voxelwise analyses of variance for the main effect of Task that compared (A) Tracking with Distracters vs. Tracking Alone and (B) Tracking with Gaps vs. Tracking Alone. Color scale represents  $z$ -statistic.
